# Supplementary material for: Novel Polyurethanes Based on Recycled Polyethylene Terephthalate: Synthesis, Characterization, and Formulation of Binders for Environmentally Responsible Rocket Propellants
Source: MDPI journal article supplement (doi:10.3390/polym13213828), 2021-11-05
Supplement: s1 [file s1]

## Supplementary Material

### **Novel Polyurethanes Based on Recycled Polyethylene Terephthalate: Synthesis, Characterization, and Formulation of Binders for Environmentally Responsible Rocket Propellants**

Florin-Marian Dîrloman,<sup>1, ‡</sup> Gabriela Toader<sup>1, ‡</sup>, Traian Rotariu<sup>1,\*</sup>, Tudor-Viorel Țigănescu<sup>1,2</sup>, Raluca Ginghina<sup>3</sup>, Răzvan Petre<sup>3</sup>, Florentina Alexe<sup>3</sup>, Mihai-Ionuț Ungureanu<sup>1</sup>, Edina Rusen<sup>4</sup>, Aurel Diacon<sup>4</sup>, Adi Ghebaur<sup>4</sup>, Monica Duldner<sup>5</sup>, Alina Elena Coman<sup>5</sup> and Robert Țincu<sup>6</sup>

<sup>1</sup> Military Technical Academy “Ferdinand I”, 39-49 George Cosbuc Boulevard, Bucharest, 050141, Romania

<sup>2</sup> Military Equipment and Technologies Research Agency, 16 Aeroportului Street, Clinceni, Ilfov, 077025, Romania

<sup>3</sup> Research and Innovation Center for CBRN Defense and Ecology, 225 Soseaua Oltenitei, Bucharest, 041327, Romania

<sup>4</sup> Faculty of Applied Chemistry and Materials Science, University Politehnica of Bucharest, 1-7 Gh. Polizu Street, Bucharest, 011061, Romania

<sup>5</sup> National Institute of Research and Development for Chemistry and Petrochemistry, 202 Splaiul Independentei, Bucharest, 060041, Romania

<sup>6</sup> Center for Organic Chemistry “C.D. Nenitescu” of the Romanian Academy, 202B Splaiul Independentei, Bucharest, 060023, Romania

<sup>‡</sup> co-first authors, equally contributed to this work

\*Correspondence: author: traian.rotariu@gmail.com

## Table of Contents

|                                                                                                                                                            |    |
|------------------------------------------------------------------------------------------------------------------------------------------------------------|----|
| Figure S1 – <sup>1</sup> H- NMR spectra for SRP1                                                                                                           | 3  |
| Figure S2 – <sup>1</sup> H- NMR spectra for SRP2                                                                                                           | 3  |
| Figure S3 – <sup>1</sup> H- NMR spectra for SRP1T2                                                                                                         | 3  |
| Figure S4 – <sup>1</sup> H- NMR spectra for SRP2T2                                                                                                         | 4  |
| Figure S5 – FT-IR spectra of RP2 polyurethane compounds                                                                                                    | 4  |
| Figure S6 – Binder characterization regarding aspect and time reaction                                                                                     | 5  |
| Figure S7 – SEM images of polyurethanes formulations based on RP1 and RP2 for 3:2 and 2:1 ratio with and without TEGDN                                     | 6  |
| Figure S8 EDX mapping of the polyurethane formulations                                                                                                     | 6  |
| Figure S9 – Tensile charts for PU formulations                                                                                                             | 7  |
| Figure S10 – Tensile charts for composite propellant formulations                                                                                          | 8  |
| Figure S11 – Compressive test charts for composite formulations                                                                                            | 9  |
| Figure S12 – SEM-EDX images of composite propellant formulations                                                                                           | 11 |
| Figure S13 – EDX spectra for free oxidizer composite formulations                                                                                          | 11 |
| Figure S14 – SEM-EDX images of free binder solid mixture                                                                                                   | 12 |
| Figure S15 – EDX spectra for free binder solid mixture                                                                                                     | 12 |
| Figure S16 – Stand burner equipped with Subscale Rocket Motor TRM-35                                                                                       | 13 |
| Figure S17 – Structural configuration of ECP_D5                                                                                                            | 13 |
| Figure S18 – Pyrotechnic composition for propellant ignition                                                                                               | 13 |
| Figure S19 – Flame configuration of ECP_D5 during the combustion                                                                                           | 14 |
| Figure S20 – Behavior of PUs during manual bending                                                                                                         | 14 |
| Figure S21 – Structural configurations of composite propellants for mechanical analysis                                                                    | 15 |
| Table S1. Weight and atomic composition of free oxidizer composite formulations                                                                            | 15 |
| Table S2. Weight and atomic composition of free binder solid mixture                                                                                       | 15 |
| Table S3. Thermal characteristics for polyurethane films, composite propellant formulations, and energetic plasticizer                                     | 15 |
| Table S4. Thermal properties of synthesized polyurethanes                                                                                                  | 15 |
| Table S5. The decomposition process of the polyurethanes (weight loss versus temperature)                                                                  | 16 |
| Table S6. Heat of combustion, specific volume and T <sub>g</sub> for our new composite propellants in comparison with the existing commercial formulations | 16 |

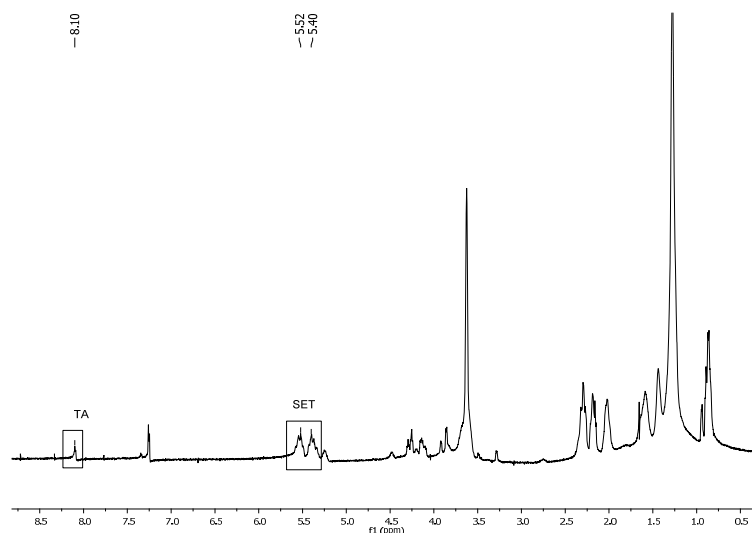

**Figure S1.** –  $^1\text{H}$ - NMR spectra for SRP1.

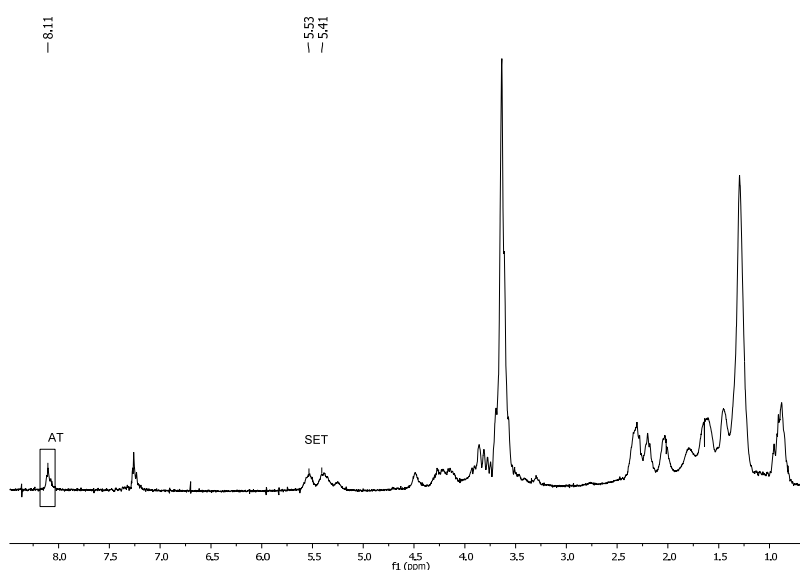

**Figure S2.** –  $^1\text{H}$ - NMR spectra for SRP2.

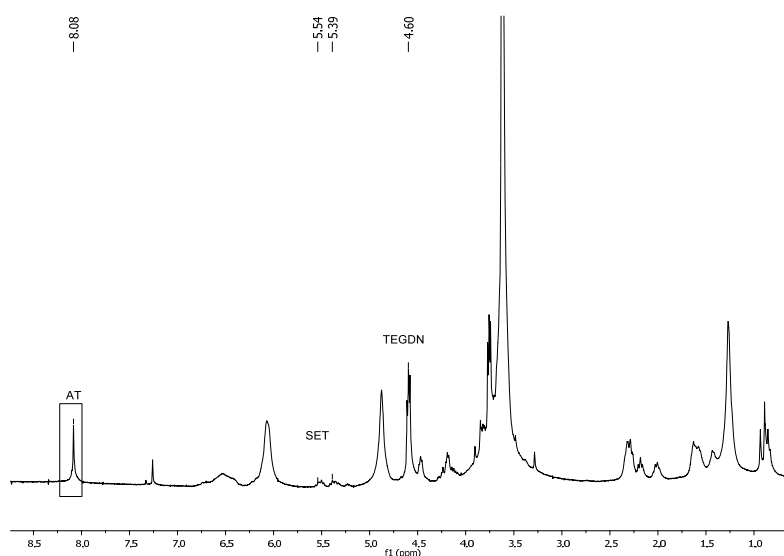

**Figure S3.** –  $^1\text{H}$ - NMR spectra for SRP1T2.

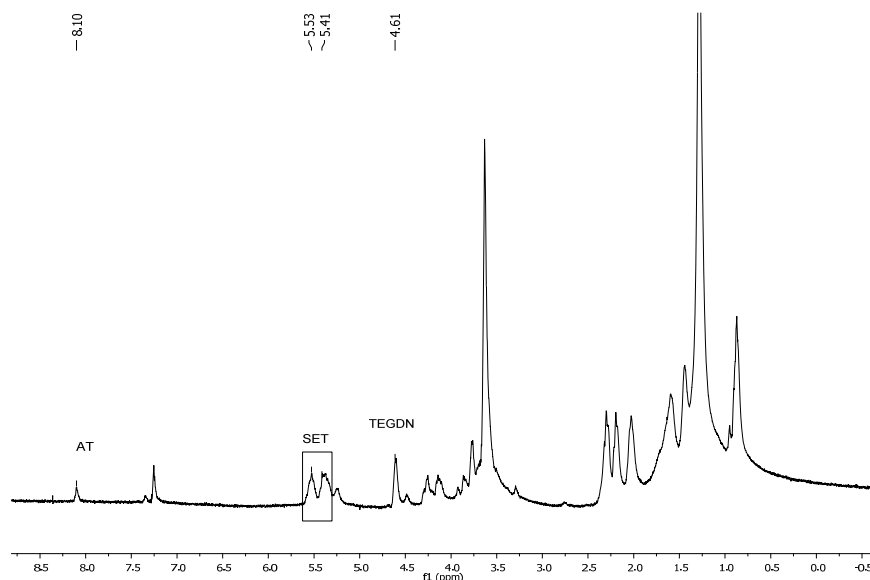

**Figure S4.** –  $^1\text{H}$ - NMR spectra for SRP2T2.

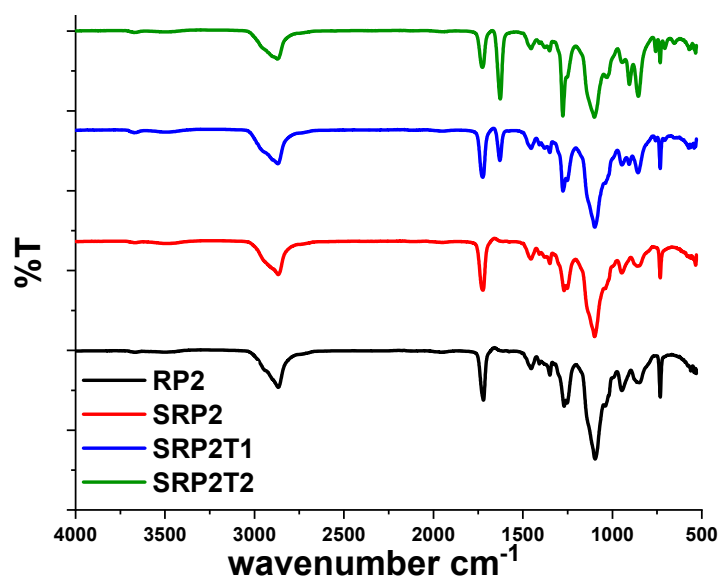

**Figure S5.** – FT-IR spectra of polyurethanes based on RP2.



|                                                                                     |                                                                                     |                                                                                     |                                                                                     |                                                                                     |                                                                                      |                                                                                       |                                                                                       |                                                                                       |
|-------------------------------------------------------------------------------------|-------------------------------------------------------------------------------------|-------------------------------------------------------------------------------------|-------------------------------------------------------------------------------------|-------------------------------------------------------------------------------------|--------------------------------------------------------------------------------------|---------------------------------------------------------------------------------------|---------------------------------------------------------------------------------------|---------------------------------------------------------------------------------------|
|    |    |    |    |    |    |    |    |    |
| Flexible, bubble-free film, compact structure<br>T <sub>c</sub> =72 h               | Flexible film, few bubbles, compact structure<br>T <sub>c</sub> =44 h               | Not so flexible, few bubbles, compact structure<br>T <sub>c</sub> =18 h             | Flexible, bubble-free film, compact structure<br>T <sub>c</sub> =94 h               | Flexible, bubble-free film, compact structure<br>T <sub>c</sub> =60 h               | Flexible, bubble-free film, compact structure<br>T <sub>c</sub> =24 h                | Flexible, bubble-free film, compact structure<br>T <sub>c</sub> =128 h                | Flexible, bubble-free film, compact structure<br>T <sub>c</sub> =102 h                | Flexible, bubble-free film, compact structure<br>T <sub>c</sub> =50 h                 |
|    |    |    |    |    |    |    |    |    |
| Sticky, gelatinous, bubble-free film<br>T <sub>c</sub> =86 h                        | Flexible film, few bubbles,, compact structure<br>T <sub>c</sub> =52 h              | Flexible film, few bubbles,, compact structure<br>T <sub>c</sub> =32 h              | Incomplete reaction<br>T <sub>c</sub> =n/a h                                        | Flexible, bubble-free film, compact structure<br>T <sub>c</sub> =102 h              | Flexible, bubble-free film, compact structure<br>T <sub>c</sub> =58 h                | Incomplete reaction<br>T <sub>c</sub> =n/a h                                          | Flexible, bubble-free film, compact structure<br>T <sub>c</sub> =132 h                | Flexible, bubble-free film, compact structure<br>T <sub>c</sub> =96 h                 |
|  |  |  |  |  |  |  |  |  |
| Sticky, gelatinous, bubble-free film<br>T <sub>c</sub> =92 h                        | Flexible film, few bubbles, compact structure<br>T <sub>c</sub> =62 h               | Flexible film, few bubbles, compact structure<br>T <sub>c</sub> =38 h               | Incomplete reaction<br>T <sub>c</sub> =n/a h                                        | Flexible, bubble-free film, compact structure<br>T <sub>c</sub> =102 h              | Flexible, bubble-free film, compact structure<br>T <sub>c</sub> =64 h                | Incomplete reaction<br>T <sub>c</sub> =n/a h                                          | Flexible, bubble-free film, irregular surface<br>T <sub>c</sub> =142 h                | Flexible, bubble-free film, irregular surface<br>T <sub>c</sub> =102 h                |

**Figure S6.** – Brief table comprising the aspect, properties, and the time of curing for each polyurethane binder.

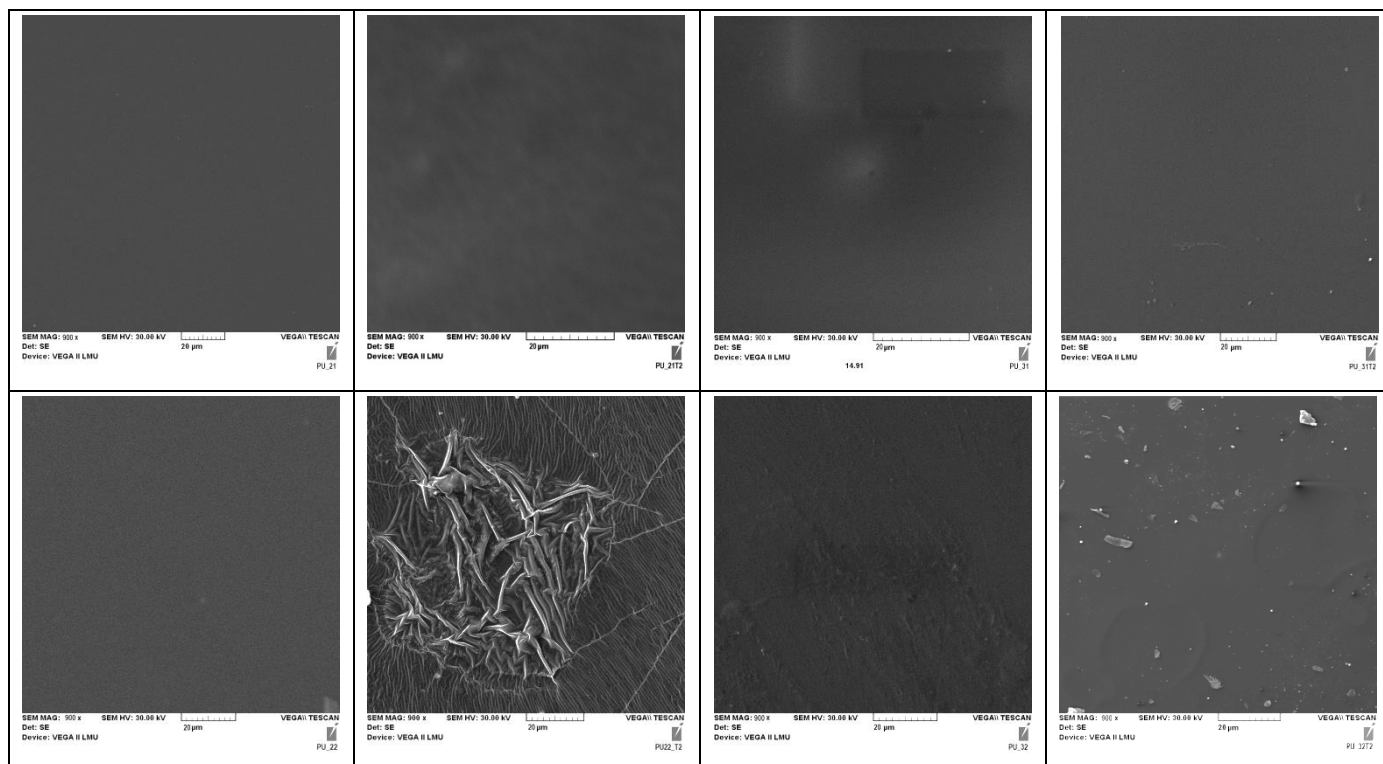

**Figure S7.** – SEM images of polyurethanes formulations based on RP1 and RP2 (with and without TEGDN).

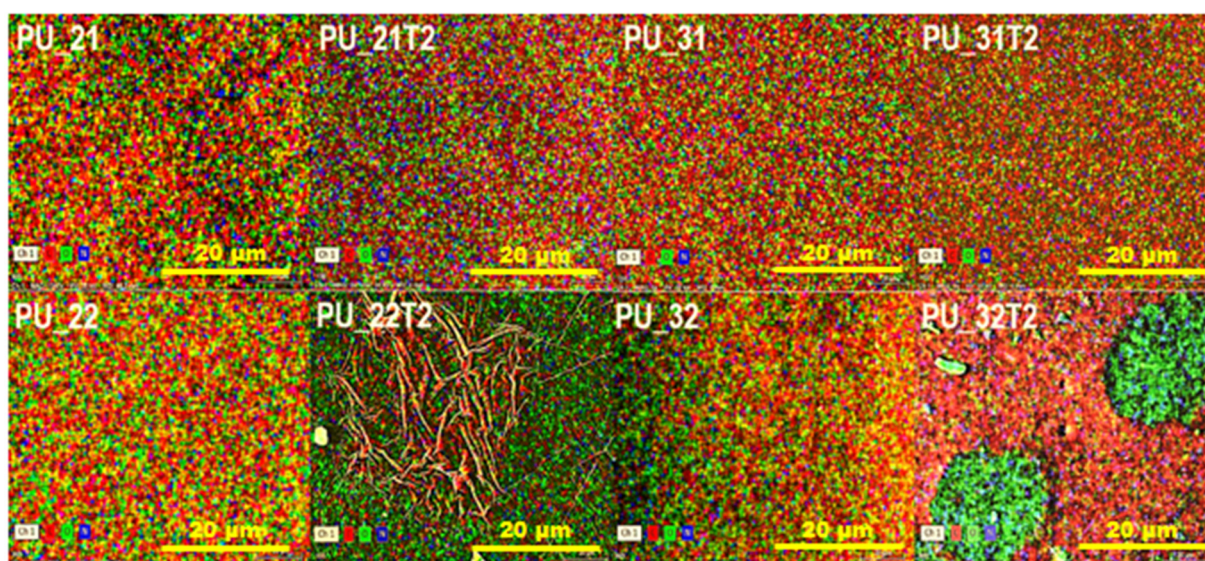

**Figure S8.** EDX mapping of the polyurethane formulations from S7.

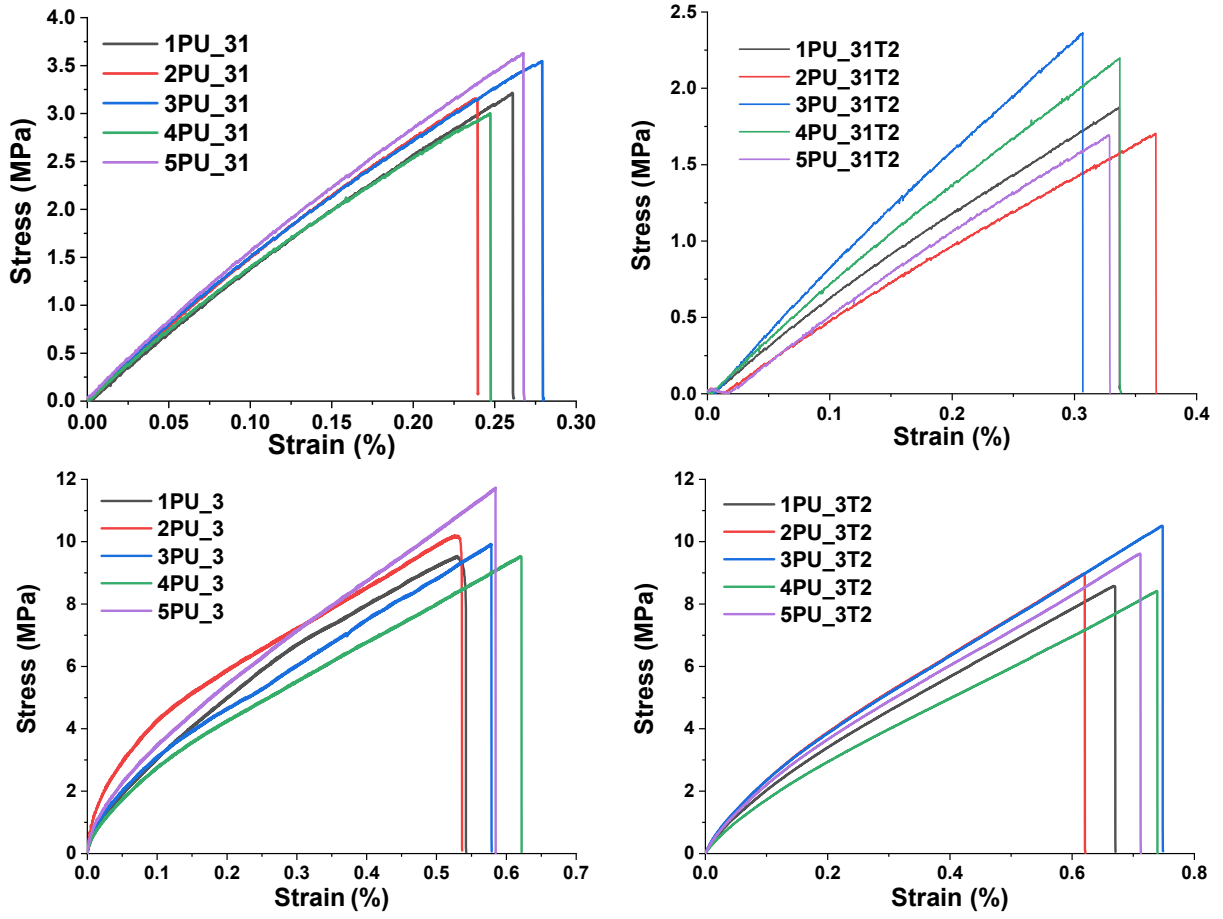

Figure S9. – Tensile stress-strain plots for PU formulations.

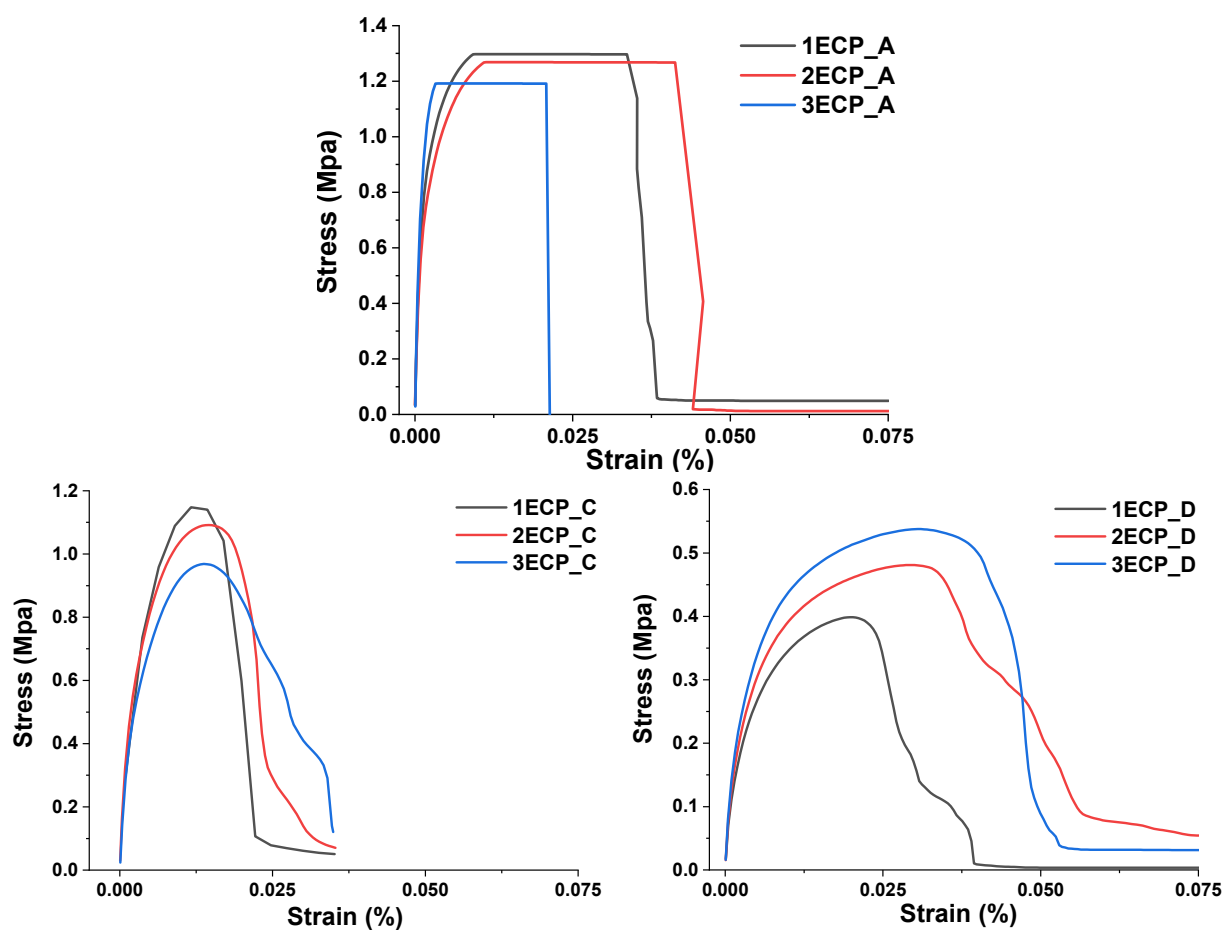

**Figure S10.** – Tensile stress-strain plots for composite propellant formulations.

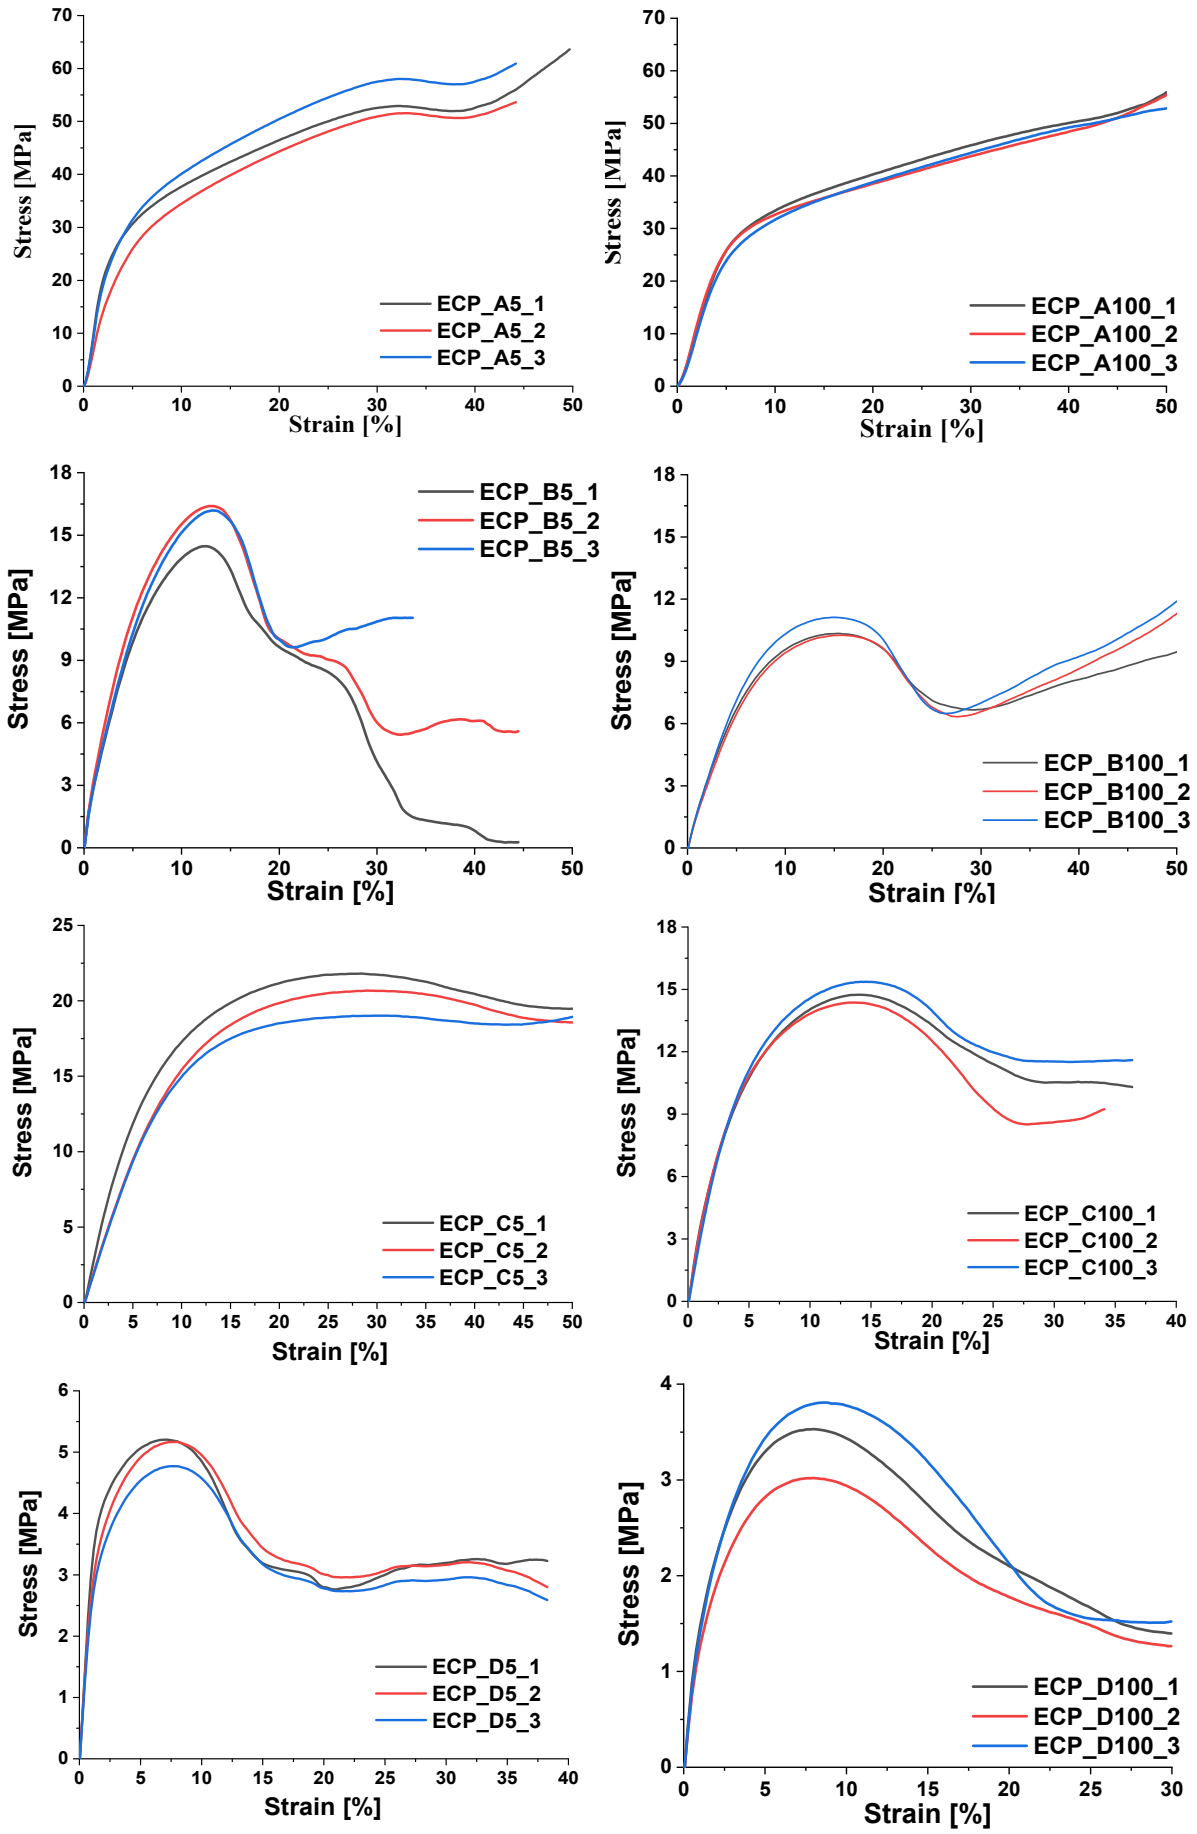

Figure S11. – Compression tests plots for composite formulations.



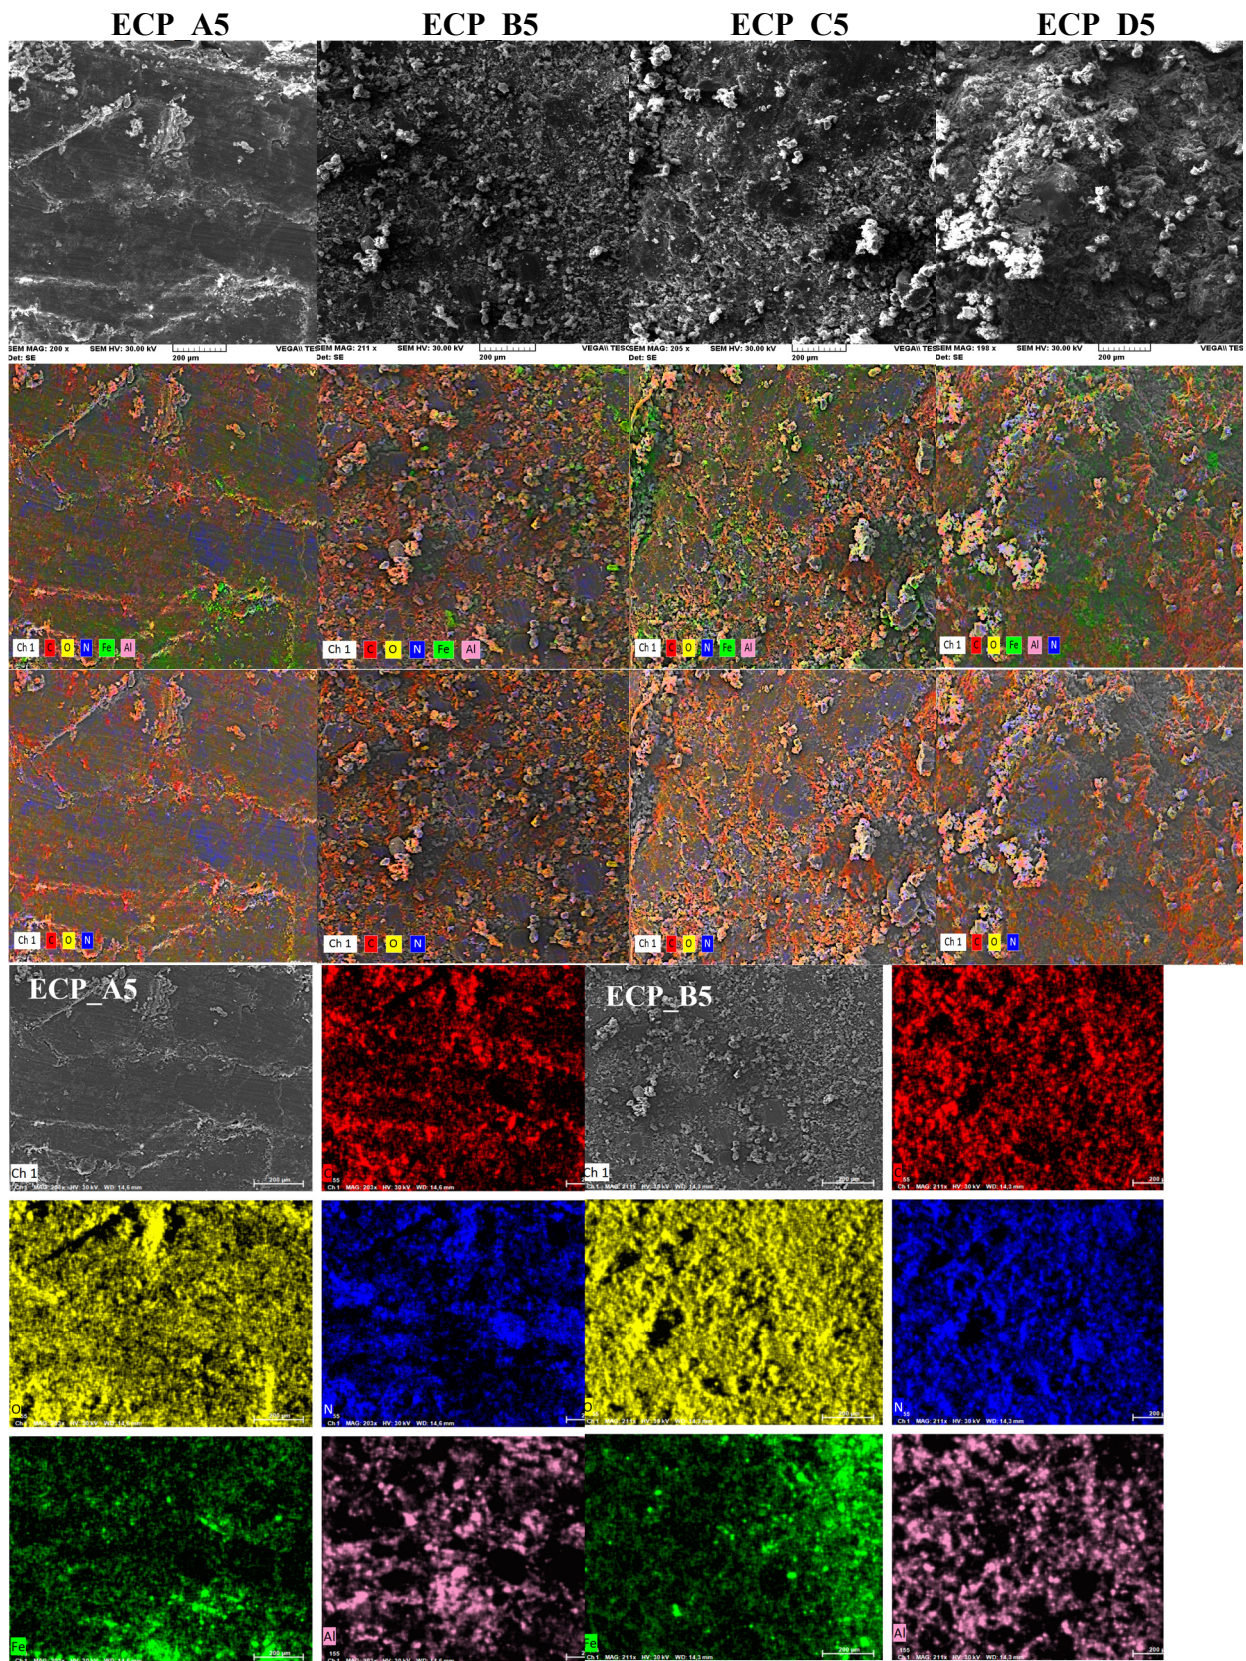



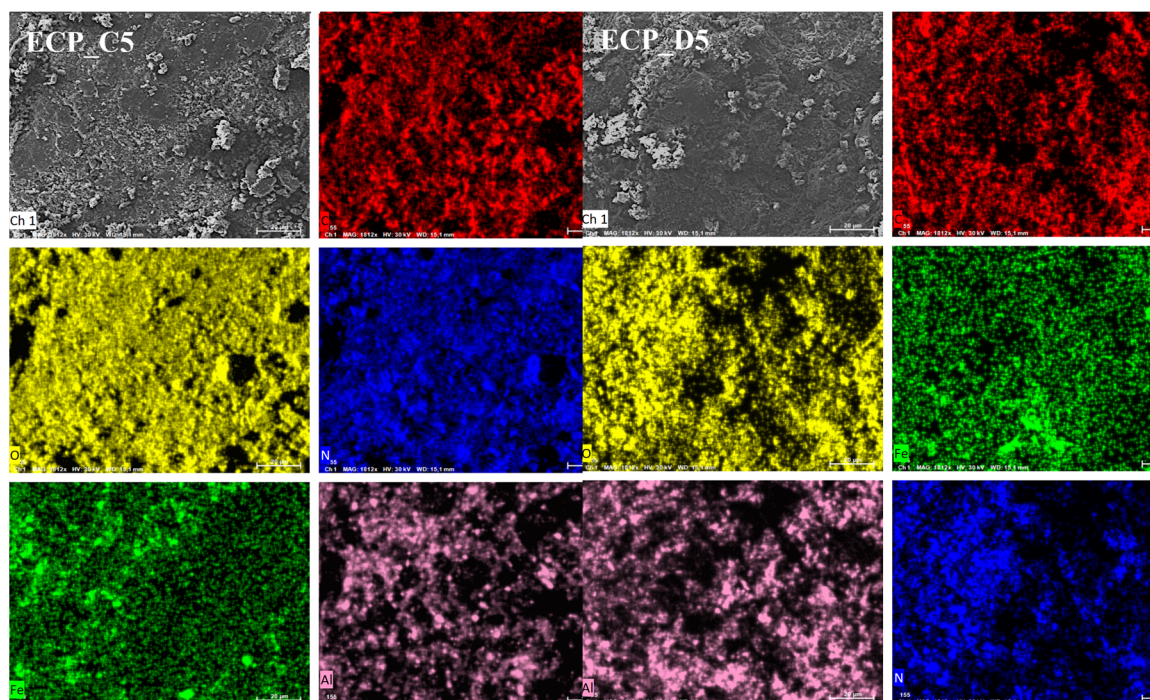

**Figure S12.** – SEM-EDX images of composite propellant formulations.

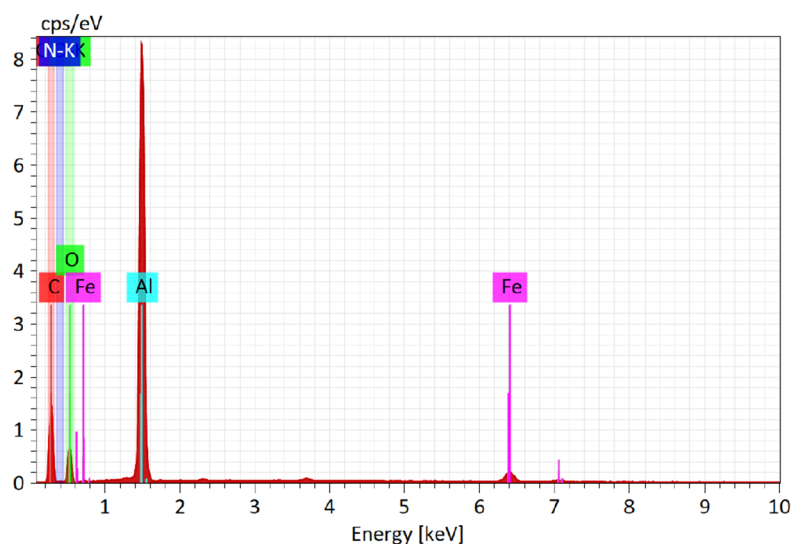

**Figure S13.** – EDX spectra for oxidizer-free composite formulations .

**Table S1.** Weight and atomic composition of oxidizer-free composite formulations.

| Element   | At. No. | Netto      | Mass [%]      | Mass Norm. [%] | Atom [%]      | abs. error [%]<br>(1 sigma) | rel. error [%]<br>(1 sigma) |
|-----------|---------|------------|---------------|----------------|---------------|-----------------------------|-----------------------------|
| Carbon    | 6       | 52579      | 119,49        | 54,32          | 65,62         | 6,53                        | 5,47                        |
| Oxygen    | 8       | 25392      | 47,09         | 21,41          | 19,42         | 2,59                        | 5,50                        |
| Aluminium | 13      | 426660     | 41,21         | 18,74          | 10,08         | 1,74                        | 4,21                        |
| Nitrogen  | 7       | 1755       | 9,77          | 4,44           | 4,60          | 0,59                        | 6,00                        |
| Iron      | 26      | 20749      | 2,39          | 1,09           | 0,28          | 0,05                        | 2,18                        |
|           |         | <b>Sum</b> | <b>219,96</b> | <b>100,00</b>  | <b>100,00</b> |                             |                             |

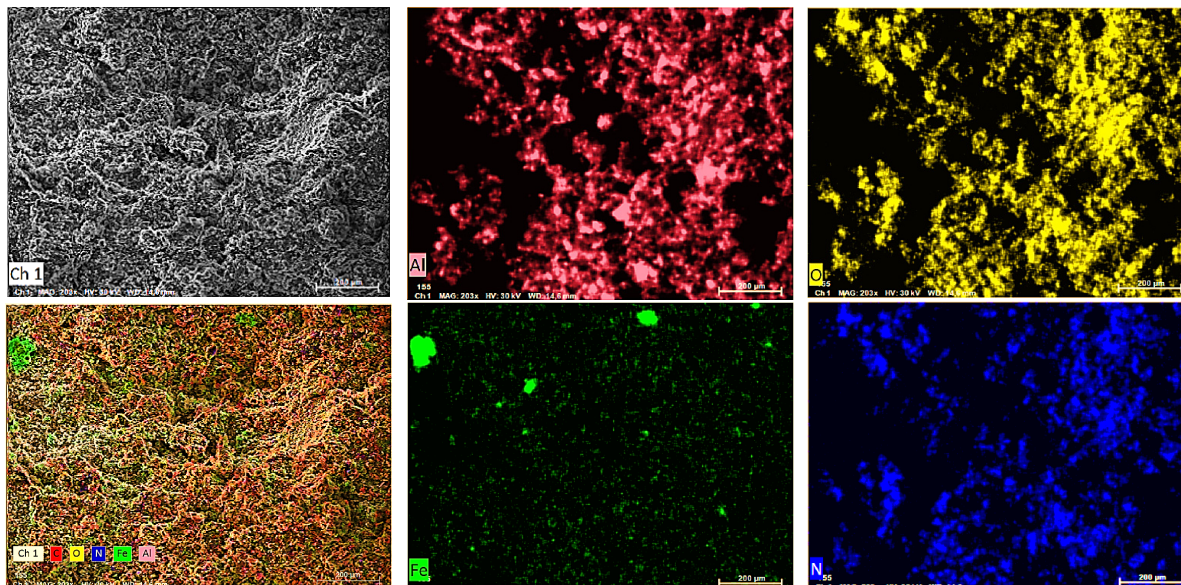

**Figure S14.** – SEM-EDX images of binder-free solid mixture.

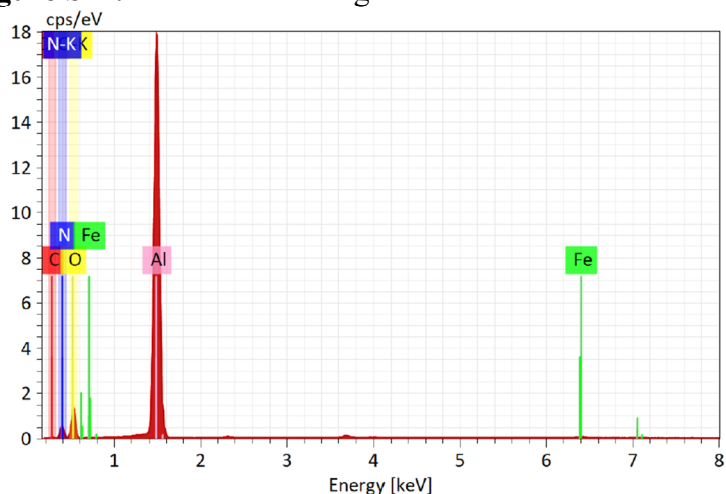

**Figure S15** – EDX spectra for binder-free solid mixture.

**Table S2.** Weight and atomic composition of free binder solid mixture.

| Element   | At. No. | Netto      | Mass [%]      | Mass Norm. [%] | Atom [%]      | abs. error [%]<br>(1 sigma) | rel. error [%]<br>(1 sigma) |
|-----------|---------|------------|---------------|----------------|---------------|-----------------------------|-----------------------------|
| Aluminium | 13      | 917245     | 58,74         | 40,03          | 28,82         | 2,30                        | 3,91                        |
| Oxygen    | 8       | 52068      | 56,50         | 38,58          | 43,88         | 2,57                        | 5,42                        |
| Nitrogen  | 7       | 21162      | 30,96         | 21,10          | 27,21         | 1,69                        | 5,47                        |
| Carbon    | 6       | 0          | 0,00          | 0,00           | 0,00          | 0,00                        | 4,36                        |
| Iron      | 26      | 5482       | 0,54          | 0,29           | 0,09          | 0,01                        | 3,09                        |
|           |         | <b>Sum</b> | <b>146,75</b> | <b>100,00</b>  | <b>100,00</b> |                             |                             |



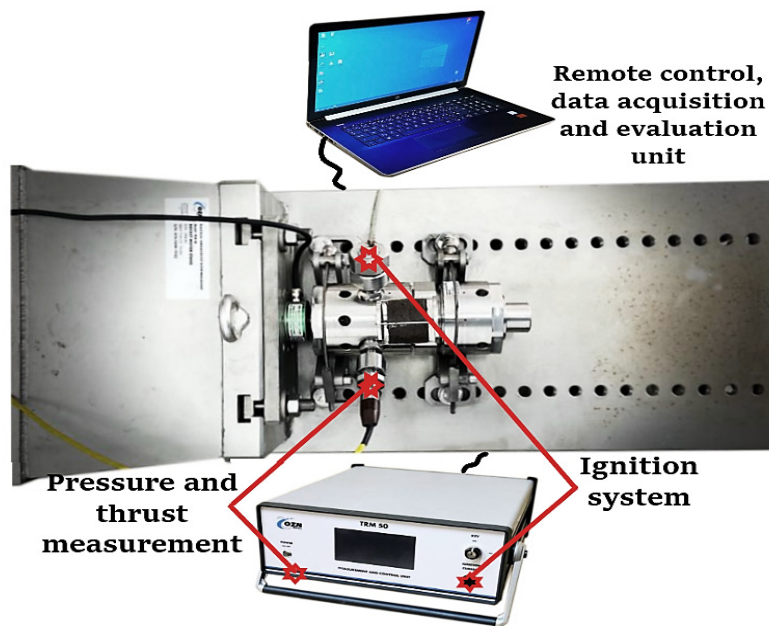

**Figure S16.** – Stand burner equipped with Subscale Rocket Motor TRM-35.

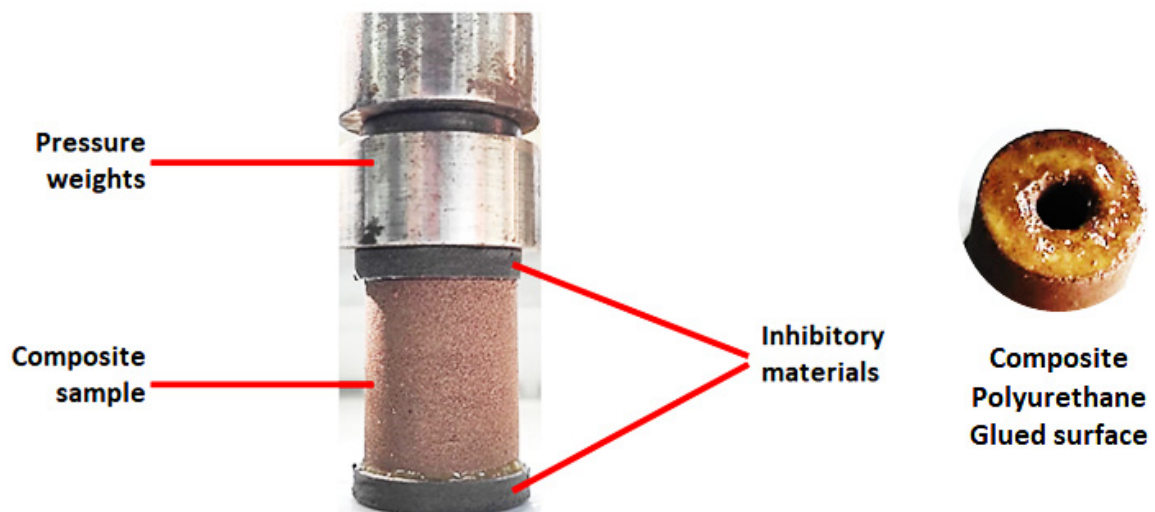

**Figure S17.** – Structural configuration of ECP\_D5.

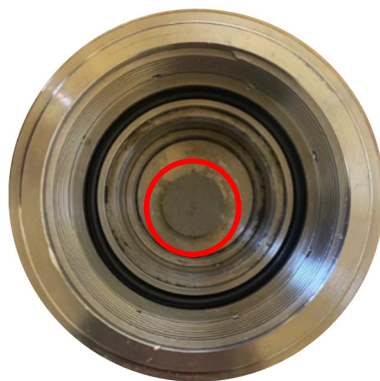

**Figure S18.** – Pyrotechnic composition for propellant ignition.

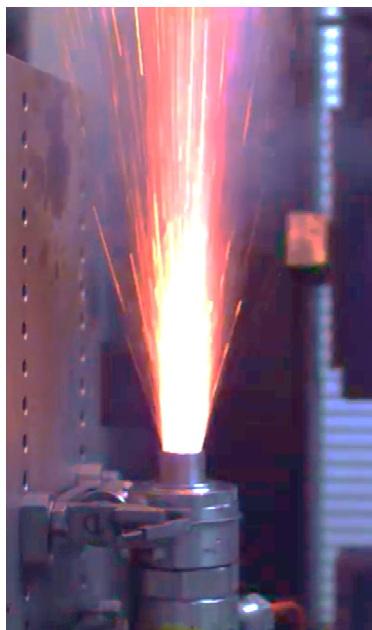

**a.**

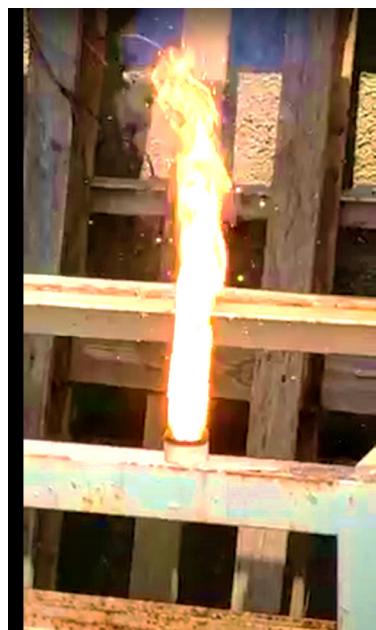

**b.**

**Figure S19.** – Flame configuration of ECP\_D5 during the combustion (a. at nozzle exit; b. outdoor).

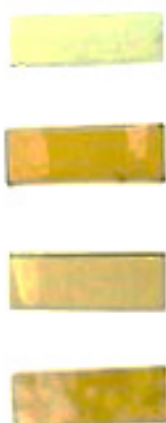

PU\_3

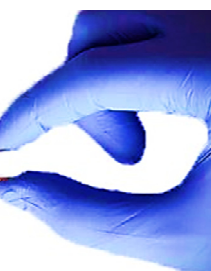

PU\_31

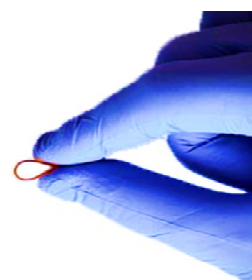

PU\_3T2

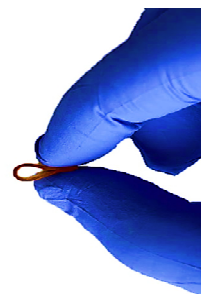

PU\_31T2

**Figure S20.** – Behavior of PUs during manual bending.

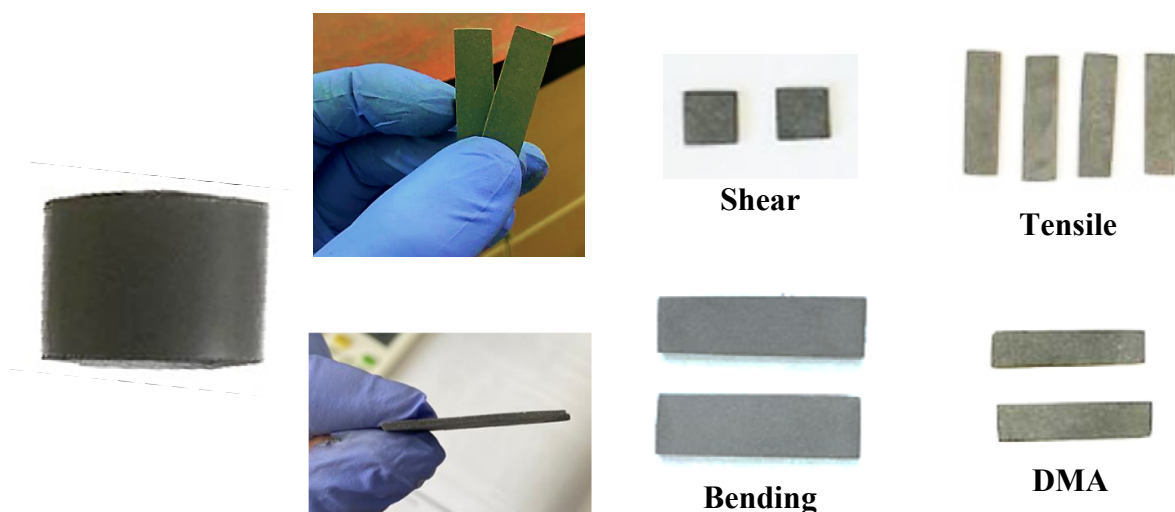

**Figure S21.** – Structural configurations of composite propellants for mechanical analysis.

**Table S3.** Thermal characteristics for polyurethane films, composite propellant formulations, and energetic plasticizer.

| Sample  | Evaluation results    |       |       |                 |                 |           |
|---------|-----------------------|-------|-------|-----------------|-----------------|-----------|
|         | Beginning temperature | Onset | Top   | Max. Difference | End Temperature | Peak Type |
| PU 2    | 208.6                 | 231.7 | 263.7 | 0.6             | 283.8           | Exotherm  |
| TEGDN   | 149.4                 | 191.8 | 193.7 | 44.6            | 225.7           | Exotherm  |
| PU 2T1  | 161.5                 | 179.2 | 200.8 | 3.9             | 228.7           | Exotherm  |
| PU 2T2  | 154.0                 | 185.2 | 196.6 | 7.8             | 228.3           | Exotherm  |
| PU 21T1 | 148.3                 | 182.3 | 199.4 | 6.2             | 200.2           | Exotherm  |
| PU 21T2 | 142.2                 | 193.7 | 194.9 | 40.3            | 207.7           | Exotherm  |
| PU 3    | 208.8                 | 239.5 | 278.7 | 0.7             | 289.7           | Exotherm  |
| PU 3T1  | 152.4                 | 179.8 | 198.6 | 4.7             | 233.6           | Exotherm  |
| PU 3T2  | 143.1                 | 185.6 | 196.2 | 14.4            | 227.9           | Exotherm  |
| PU 31T1 | 159.1                 | 180.7 | 197.4 | 6.5             | 229.9           | Exotherm  |
| PU 31T2 | 150.9                 | 190.3 | 191.2 | 52.4            | 202.5           | Exotherm  |
| ECP A5  | 160.5                 | 164.1 | 54.1  | 2.5             | 299.9           | Exotherm  |
| ECP B5  | 155.8                 | 165.3 | 183.7 | 32.8            | 195.8           | Exotherm  |
| ECP D5  | 159.5                 | 176.5 | 183.8 | 75.1            | 194.3           | Exotherm  |

**Table S4.** Thermal properties of synthesized polyurethanes.

| Sample  | T <sub>10%</sub> <sup>1</sup><br>[°C] | T <sub>max1</sub> <sup>2</sup><br>[°C] | T <sub>max2</sub> <sup>2</sup><br>[°C] | T <sub>max3</sub> <sup>2</sup><br>[°C] | T <sub>max4</sub> <sup>2</sup><br>[°C] |
|---------|---------------------------------------|----------------------------------------|----------------------------------------|----------------------------------------|----------------------------------------|
| PU 3    | 306.1                                 | 313.6                                  | 371.1                                  | 456.1                                  | -                                      |
| PU 31   | 313.5                                 | 313.5                                  | 410.9                                  | -                                      | -                                      |
| PU 3T2  | 197.6                                 | 190.1                                  | 315.1                                  | 370.1                                  | 457.6                                  |
| PU 31T2 | 181.4                                 | 193.9                                  | 326.4                                  | 408.9                                  | -                                      |

<sup>1</sup>decomposition onset temperature (measured at 10 % weight loss).

<sup>2</sup>the maximum decomposition temperatures, corresponding to the maximum of DTG peaks.

**Table S5.** The decomposition process of the polyurethanes (weight loss versus temperature).

| Sample         | Weight loss<br>[%] |       |       |       |       |       |       |       |       |
|----------------|--------------------|-------|-------|-------|-------|-------|-------|-------|-------|
|                | 200°C              | 250°C | 300°C | 350°C | 400°C | 450°C | 500°C | 550°C | 600°C |
| <b>PU 3</b>    | 0.5                | 0.8   | 7.1   | 32.1  | 60.3  | 70.3  | 92.9  | 94.2  | 95.1  |
| <b>PU 3I</b>   | 1.1                | 1.4   | 6.4   | 19.4  | 43.4  | 77.4  | 85.9  | 87.8  | 88.6  |
| <b>PU 3T2</b>  | 10.1               | 13.8  | 20.2  | 37.9  | 55.9  | 73.1  | 91.9  | 94.3  | 95.2  |
| <b>PU 3IT2</b> | 18.4               | 25.1  | 29.5  | 39.7  | 58.8  | 81.7  | 87.5  | 88.9  | 89.7  |

**Table S6.** Heat of combustion, specific volume and  $T_g$  for our new composite propellants in comparison with the existing commercial formulations.

| Sample                                   | Qv<br>[cal/g] | Vsp<br>[l/kg] | $T_g$   |
|------------------------------------------|---------------|---------------|---------|
| <b>HTPB<br/>composite<br/>propellant</b> | 1700          | 507           | -72°C   |
| <b>Double based<br/>propellants</b>      | 1020          | 798           | -35.5°C |
| <b>ECP D5</b>                            | 1002          | 693           | -32°C   |
| <b>ECP B5</b>                            | 1010          | 658           | -61°C   |
